# Supplementary material for: Carbon sequestration potential of second-growth forest regeneration in the Latin American tropics
Source: PubMed Central journal article supplement — Sci Adv. 2016 May 13;2(5):e1501639. doi: 10.1126/sciadv.1501639 (PMC4928921; doi:10.1126/sciadv.1501639), 2016-05-13
Supplement: 1501639_SM.pdf [file 1501639_SM.pdf]

## Supplementary Materials for

### **Carbon sequestration potential of second-growth forest regeneration in the Latin American tropics**

Robin L. Chazdon, Eben N. Broadbent, Danaë M. A. Rozendaal, Frans Bongers, Angélica María Almeyda Zambrano, T. Mitchell Aide, Patricia Balvanera, Justin M. Becknell, Vanessa Boukili, Pedro H. S. Brancalion, Dylan Craven, Jarcilene S. Almeida-Cortez, George A. L. Cabral, Ben de Jong, Julie S. Denslow, Daisy H. Dent, Saara J. DeWalt, Juan M. Dupuy, Sandra M. Durán, Mario M. Espirito-Santo, María C. Fandino, Ricardo G. César, Jefferson S. Hall, José Luis Hernández-Stefanoni, Catarina C. Jakovac, André B. Junqueira, Deborah Kennard, Susan G. Letcher, Madelon Lohbeck, Miguel Martínez-Ramos, Paulo Massoca, Jorge A. Meave, Rita Mesquita, Francisco Mora, Rodrigo Muñoz, Robert Muscarella, Yule R. F. Nunes, Susana Ochoa-Gaona, Edith Orihuela-Belmonte, Marielos Peña-Claros, Eduardo A. Pérez-García, Daniel Piotto, Jennifer S. Powers, Jorge Rodríguez-Velazquez, Isabel Eunice Romero-Pérez, Jorge Ruíz, Juan G. Saldarriaga, Arturo Sanchez-Azofeifa, Naomi B. Schwartz, Marc K. Steininger, Nathan G. Swenson, Maria Uriarte, Michiel van Breugel, Hans van der Wal, Maria D. M. Veloso, Hans Vester, Ima Celia G. Vieira, Tony Vizcarra Bentos, G. Bruce Williamson, Lourens Poorter

Published 13 May 2016, *Sci. Adv.* **2**, e1501639 (2016)

DOI: 10.1126/sciadv.1501639

#### **The PDF file includes:**

- fig. S1. Carbon sequestration potential during 2008–2048 for crop areas of a lowland Neotropical forest.
- fig. S2. Carbon sequestration potential during 2008–2048 for pasture areas of a lowland Neotropical forest.
- fig. S3. Carbon sequestration potential during 2008–2048 for areas of YSFs and MSFs (in 2008), crops, and pasture combined.
- table S1. Area, carbon stocks, and sequestration potential of different land cover types in lowland moist and dry tropical forest biomes.
- table S2. Area, carbon stocks, and sequestration potential of Latin American countries.
- table S3. Ranked area, carbon stocks, and sequestration potential of different land cover types in lowland moist and dry tropical forest biomes of the top 10 Latin American countries.

**table S1. Area, carbon stocks, and sequestration potential of different land cover types in lowland moist and dry tropical forest biomes.** Areas with land uses in 2008, aboveground carbon stock in 2008 and net carbon sequestration potential 2008–2048 for two biomes in lowland Latin America; moist forest and dry forest (including caatinga). The land uses are classified as young ( $\leq 20$  yr), mid (20–60 yr), pasture land, and cropland. Carbon gain for Old SF and Old Growth are not shown, because they cannot be estimated accurately. Areas are given in km<sup>2</sup>, aboveground carbon stock (AGC) is given in Pg, and net carbon sequestration potential over four decades (2008–2048) is given in Pg. The numbers refer to the lowland (< 1000 m altitude) tropics only.

| <b>Land use</b>     | <b>2008</b>       |                 | <b>Net C Gain (2008-48)</b> |
|---------------------|-------------------|-----------------|-----------------------------|
|                     | <b>Area (Km2)</b> | <b>AGC (Pg)</b> | <b>AGC (Pg)</b>             |
| <b>Moist Forest</b> |                   |                 |                             |
| Young SF            | 1,088,152         | 5.7877          | 5.9588                      |
| Mid SF              | 787,465           | 7.9847          | 1.5307                      |
| Old SF              | 425,824           | 5.2397          | -                           |
| Old Growth          | 3,821,118         | 54.0255         | -                           |
| Pasture             | 810,272           | 4.6614          | 4.1834                      |
| Crops               | 391,406           | 1.9326          | 2.2062                      |
| Sub total           | 7,324,237         | 79.6316         | 14.4874                     |
| <b>Dry Forest</b>   |                   |                 |                             |
| Young SF            | 424,517           | 1.1918          | 0.8814                      |
| Mid SF              | 138,472           | 0.6181          | 0.1059                      |
| Old SF              | 35,695            | 0.2010          | -                           |
| Old Growth          | 221,940           | 1.3604          | -                           |
| Pasture             | 375,988           | 1.5104          | 0.8091                      |
| Crops               | 166,900           | 0.6031          | 0.4268                      |
| Sub total           | 1,363,510         | 5.4847          | 2.2378                      |

**table S2. Area, carbon stocks, and sequestration potential of Latin American countries.** (A) Areas with land uses in 2008, (B) aboveground carbon in 2008 and (C) net carbon sequestration potential 2008–48 for all lowland Latin American countries. The land uses are classified as young ( $\leq 20$  yr), mid (20–60 yr) and old (60–100 yr) second-growth forest (SF), old growth (OG,  $>100$  yr) forest, pasture land and cropland. Areas are given in  $\text{km}^2$ , aboveground carbon stock (AGC) is given in Pg, and net carbon sequestration potential over four decades (2008–2048) is given in Pg. The numbers refer to the lowland ( $< 1000$  m altitude) tropics only.

**SM. 2A.****2008 Area (km<sup>2</sup>)**

| <b>Country</b>     | <b>Young SF</b>  | <b>Mid SF</b>  | <b>Old SF</b>  | <b>OG</b>        | <b>Pasture</b>   | <b>Crops</b>   |
|--------------------|------------------|----------------|----------------|------------------|------------------|----------------|
| Argentina          | 1,901            | 1,799          | 667            | 4,222            | 29               | 657            |
| Belize             | 3,907            | 2,672          | 479            | 7,967            | 451              | 898            |
| Bolivia            | 24,714           | 36,632         | 17,527         | 225,596          | 95,141           | 20,056         |
| Brazil             | 1,123,747        | 591,454        | 254,558        | 2,249,820        | 653,447          | 274,652        |
| British Virgin Is. | 18               | 15             | 5              | 18               | 0                | 6              |
| Cayman Is.         | 47               | 1              | 0              | 0                | 0                | 0              |
| Colombia           | 69,059           | 68,646         | 38,537         | 353,549          | 145,851          | 20,486         |
| Costa Rica         | 7,073            | 3,409          | 561            | 3,155            | 16,661           | 4,126          |
| Cuba               | 17,496           | 4,622          | 1,106          | 3,166            | 18,905           | 35,850         |
| Dominican Republic | 3,972            | 3,308          | 392            | 1,324            | 15,475           | 10,527         |
| Ecuador            | 11,932           | 11,169         | 7,609          | 52,592           | 15,344           | 6,402          |
| El Salvador        | 1,087            | 154            | 28             | 128              | 2,442            | 3,821          |
| French Guiana      | 618              | 3,152          | 7,618          | 66,224           | 59               | 71             |
| Grenada            | 78               | 81             | 2              | 2                | 0                | 98             |
| Guatemala          | 19,559           | 7,306          | 834            | 10,917           | 13,899           | 11,894         |
| Guyana             | 8,175            | 14,956         | 18,657         | 131,233          | 5,490            | 3,414          |
| Haiti              | 6,257            | 986            | 54             | 242              | 3,496            | 10,045         |
| Honduras           | 10,982           | 10,291         | 1,624          | 11,231           | 5,115            | 8,112          |
| Jamaica            | 1,974            | 2,060          | 274            | 1,140            | 1,946            | 2,175          |
| Mexico             | 96,920           | 41,410         | 8,417          | 55,124           | 58,257           | 93,880         |
| Nicaragua          | 11,298           | 10,944         | 2,075          | 10,658           | 35,329           | 16,918         |
| Panama             | 17,603           | 9,403          | 2,859          | 12,194           | 12,678           | 6,363          |
| Paraguay           | 231              | 118            | 24             | 13               | 7,275            | 2,096          |
| Peru               | 15,341           | 34,691         | 43,034         | 511,866          | 5,772            | 9,293          |
| Puerto Rico        | 1,961            | 1,956          | 267            | 688              | 1,368            | 819            |
| St. Kitts & Nevis  | 0                | 1              | 0              | 5                | 0                | 2              |
| Suriname           | 3,306            | 4,527          | 8,681          | 109,362          | 128              | 364            |
| Trinidad & Tobago  | 1,137            | 1,529          | 280            | 378              | 78               | 331            |
| Venezuela          | 52,272           | 58,628         | 45,345         | 220,242          | 71,627           | 14,945         |
| Virgin Is.         | 2                | 14             | 2              | 3                | 0                | 5              |
| <b>Total</b>       | <b>1,512,668</b> | <b>925,936</b> | <b>461,518</b> | <b>4,043,058</b> | <b>1,186,260</b> | <b>558,306</b> |

**SM. 2B.****2008 AGC (Pg)**

| <b>Country</b>     | <b>Young SF</b> | <b>Mid SF</b> | <b>Old SF</b> | <b>OG</b> | <b>Pasture</b> | <b>Crops</b> |
|--------------------|-----------------|---------------|---------------|-----------|----------------|--------------|
| Argentina          | 0.0087          | 0.0151        | 0.0061        | 0.0408    | 0.0002         | 0.0028       |
| Belize             | 0.0201          | 0.0239        | 0.0053        | 0.1002    | 0.0028         | 0.0041       |
| Bolivia            | 0.1287          | 0.3141        | 0.1794        | 2.6861    | 0.8236         | 0.0950       |
| Brazil             | 5.0414          | 5.5342        | 2.9930        | 31.0021   | 2.6965         | 1.1163       |
| British Virgin Is. | 0.0001          | 0.0001        | 0.0001        | 0.0002    | 0.0000         | 0.0000       |
| Cayman Is.         | 0.0002          | 0.0000        | 0.0000        | 0.0000    | 0.0000         | 0.0000       |
| Colombia           | 0.3746          | 0.6411        | 0.4520        | 4.9958    | 0.9205         | 0.1092       |
| Costa Rica         | 0.0381          | 0.0301        | 0.0065        | 0.0425    | 0.1141         | 0.0225       |
| Cuba               | 0.0643          | 0.0338        | 0.0107        | 0.0328    | 0.1049         | 0.1395       |
| Dominican Republic | 0.0173          | 0.0263        | 0.0034        | 0.0110    | 0.0927         | 0.0527       |
| Ecuador            | 0.0784          | 0.1043        | 0.0915        | 0.7341    | 0.1553         | 0.0499       |
| El Salvador        | 0.0044          | 0.0009        | 0.0002        | 0.0008    | 0.0105         | 0.0161       |
| French Guiana      | 0.0035          | 0.0331        | 0.0932        | 0.9212    | 0.0007         | 0.0005       |
| Grenada            | 0.0005          | 0.0007        | 0.0000        | 0.0000    | 0.0000         | 0.0007       |
| Guatemala          | 0.0992          | 0.0617        | 0.0089        | 0.1294    | 0.0864         | 0.0738       |
| Guyana             | 0.0378          | 0.1580        | 0.2300        | 1.7956    | 0.0434         | 0.0273       |
| Haiti              | 0.0254          | 0.0075        | 0.0004        | 0.0009    | 0.0166         | 0.0433       |
| Honduras           | 0.0548          | 0.0787        | 0.0158        | 0.1378    | 0.0303         | 0.0414       |
| Jamaica            | 0.0117          | 0.0188        | 0.0032        | 0.0156    | 0.0156         | 0.0139       |
| Mexico             | 0.4408          | 0.3183        | 0.0741        | 0.4636    | 0.2879         | 0.4213       |
| Nicaragua          | 0.0635          | 0.0975        | 0.0228        | 0.1253    | 0.2364         | 0.1012       |
| Panama             | 0.0885          | 0.0911        | 0.0340        | 0.1636    | 0.0877         | 0.0287       |
| Paraguay           | 0.0011          | 0.0011        | 0.0003        | 0.0002    | 0.0362         | 0.0089       |
| Peru               | 0.0944          | 0.3475        | 0.5412        | 7.4561    | 0.0498         | 0.0925       |
| Puerto Rico        | 0.0090          | 0.0174        | 0.0031        | 0.0091    | 0.0109         | 0.0049       |
| St. Kitts & Nevis  | 0.0000          | 0.0000        | 0.0000        | 0.0000    | 0.0000         | 0.0000       |
| Suriname           | 0.0151          | 0.0466        | 0.1052        | 1.4882    | 0.0012         | 0.0015       |
| Trinidad & Tobago  | 0.0057          | 0.0144        | 0.0033        | 0.0051    | 0.0005         | 0.0015       |
| Venezuela          | 0.2523          | 0.5865        | 0.5569        | 3.0279    | 0.3471         | 0.0660       |
| Virgin Is.         | 0.0000          | 0.0001        | 0.0000        | 0.0000    | 0.0000         | 0.0000       |
| Total              | 6.9796          | 8.6028        | 5.4407        | 55.3859   | 6.1718         | 2.5356       |

**SM. 2C.**

| <b>Country</b>     | <b>Young SF</b> | <b>Mid SF</b> | <b>Pasture</b> | <b>Crops</b> |
|--------------------|-----------------|---------------|----------------|--------------|
| Argentina          | 0.0079          | 0.0013        | 0.0000         | 0.0029       |
| Belize             | 0.0192          | 0.0054        | 0.0019         | 0.0047       |
| Bolivia            | 0.1008          | 0.0580        | 0.1658         | 0.0615       |
| Brazil             | 5.0749          | 0.9675        | 3.2080         | 1.5300       |
| British Virgin Is. | 0.0001          | 0.0000        | 0.0000         | 0.0000       |
| Cayman Is.         | 0.0003          | 0.0000        | 0.0000         | 0.0000       |
| Colombia           | 0.3577          | 0.1632        | 0.6207         | 0.1033       |
| Costa Rica         | 0.0311          | 0.0085        | 0.0607         | 0.0176       |
| Cuba               | 0.0689          | 0.0072        | 0.0572         | 0.1280       |
| Dominican Republic | 0.0185          | 0.0073        | 0.0572         | 0.0448       |
| Ecuador            | 0.0526          | 0.0291        | 0.0375         | 0.0237       |
| El Salvador        | 0.0031          | 0.0001        | 0.0055         | 0.0087       |
| French Guiana      | 0.0033          | 0.0057        | 0.0001         | 0.0003       |
| Grenada            | 0.0003          | 0.0002        | 0.0000         | 0.0004       |
| Guatemala          | 0.0870          | 0.0150        | 0.0522         | 0.0418       |
| Guyana             | 0.0501          | 0.0282        | 0.0207         | 0.0130       |
| Haiti              | 0.0366          | 0.0023        | 0.0175         | 0.0546       |
| Honduras           | 0.0398          | 0.0190        | 0.0124         | 0.0233       |
| Jamaica            | 0.0092          | 0.0050        | 0.0065         | 0.0093       |
| Mexico             | 0.3596          | 0.0614        | 0.1814         | 0.3782       |
| Nicaragua          | 0.0410          | 0.0227        | 0.1007         | 0.0483       |
| Panama             | 0.0966          | 0.0196        | 0.0545         | 0.0353       |
| Paraguay           | 0.0012          | 0.0003        | 0.0379         | 0.0122       |
| Peru               | 0.0744          | 0.0842        | 0.0148         | 0.0221       |
| Puerto Rico        | 0.0098          | 0.0048        | 0.0044         | 0.0035       |
| St. Kitts & Nevis  | 0.0000          | 0.0000        | 0.0000         | 0.0000       |
| Suriname           | 0.0205          | 0.0084        | 0.0004         | 0.0024       |
| Trinidad & Tobago  | 0.0064          | 0.0036        | 0.0003         | 0.0020       |
| Venezuela          | 0.2692          | 0.1083        | 0.2742         | 0.0612       |
| Virgin Is.         | 0.0000          | 0.0000        | 0.0000         | 0.0000       |
| Total              | 6.8402          | 1.6366        | 4.9925         | 2.6330       |

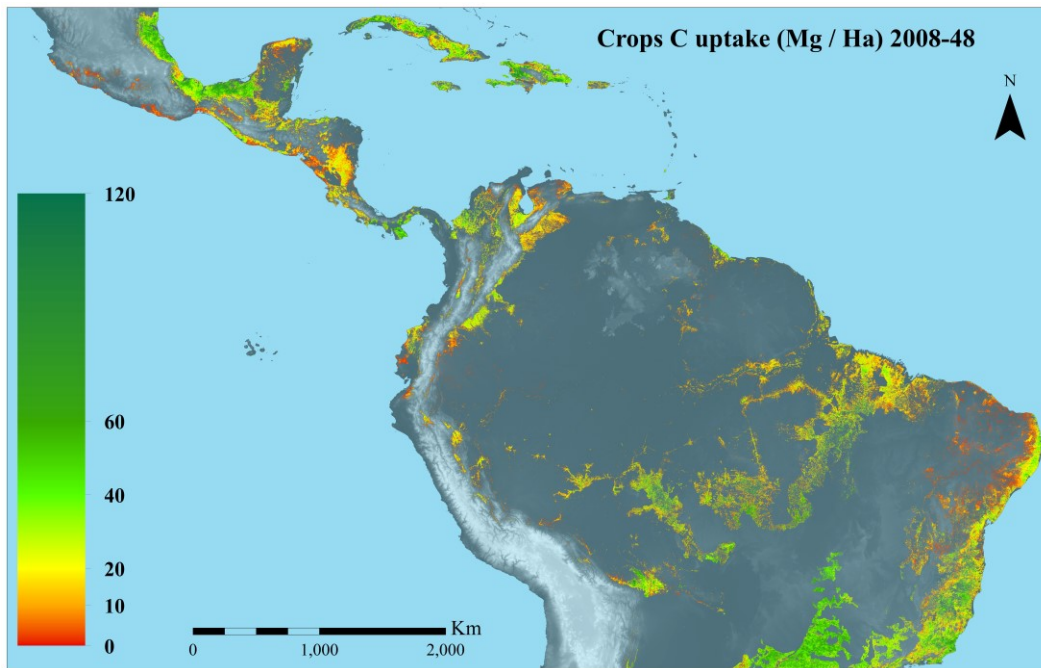

**fig. S1. Carbon sequestration potential during 2008–2048 for crop areas of a lowland Neotropical forest.** The biomes covered are moist and dry (including caatinga) tropical forests. Masked wetlands are mapped in dark blue. Additional masked areas include urban areas, areas > 1000 m elevation, and water bodies, including savannas, rivers, lakes and the ocean. The base map is the digital elevation model and is provided in masked areas or those with 0 crop C sequestration due to no cropland being present in 2008. Our model assumes no changes in cropland areas from 2008–2048.

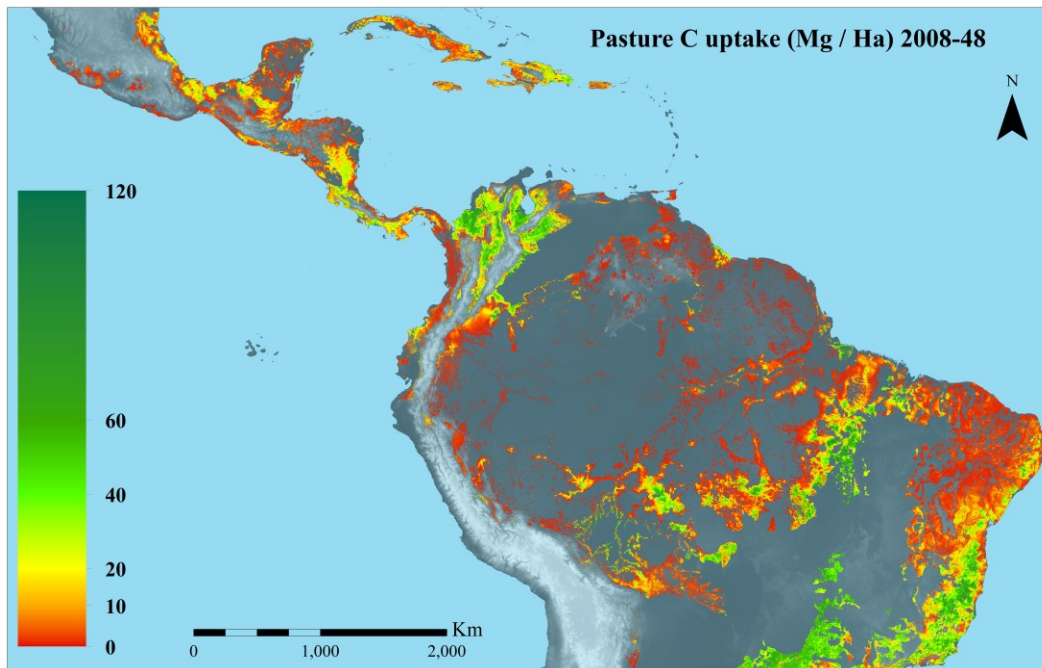

**fig. S2. Carbon sequestration potential during 2008-2048 for pasture areas of a lowland Neotropical forest.** The biomes covered are moist and dry (including caatinga) tropical forests. Masked wetlands are mapped in dark blue. Additional masked areas include urban areas, areas > 1000 m elevation, and water bodies, including savannas, rivers, lakes and the ocean. The base map is the digital elevation model and is provided in masked areas or those with 0 pasture C sequestration due to no pastures being present in 2008. Our model assumes no changes in pasture areas from 2008–2048.



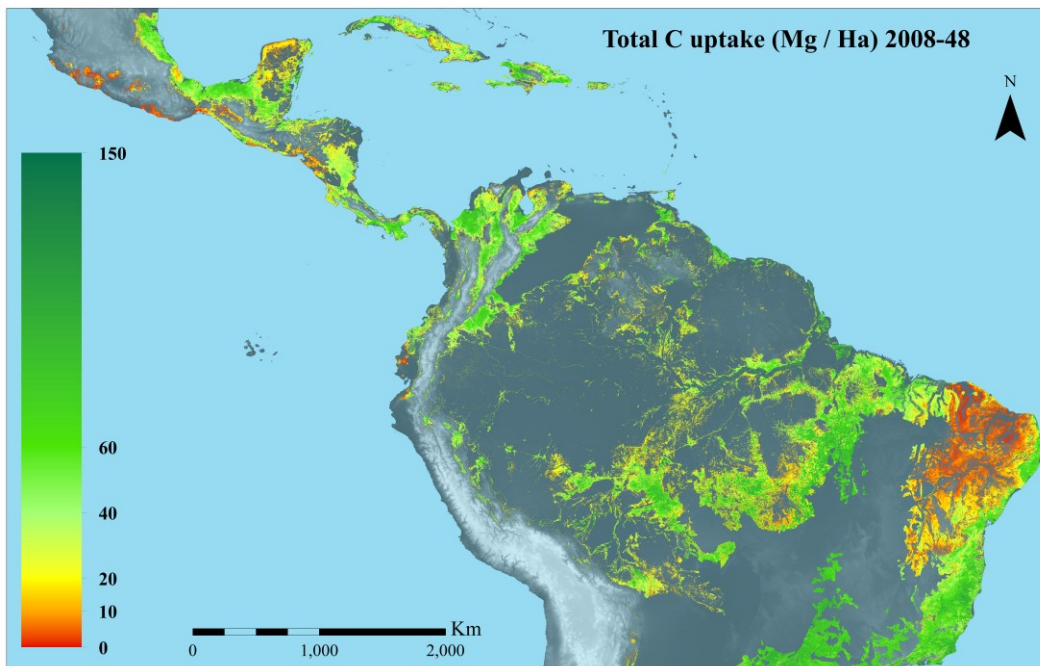

**fig. S3. Carbon sequestration potential during 2008-2048 for areas of YSFs and MSFs (in 2008), crops, and pasture combined.** The biomes covered are moist and dry (including caatinga) tropical forests. Masked wetlands are mapped in dark blue. Additional masked areas include urban areas, areas > 1000 m elevation, and water bodies, including savannas, rivers, lakes and the ocean. The base map is the digital elevation model and is provided in masked areas or those with 0 C sequestration due to no YSF, MSF, crops or pasture being present in 2008.
